# Supplementary material for: Efficient maternal to neonatal transfer of antibodies against SARS-CoV-2 and BNT162b2 mRNA COVID-19 vaccine
Source: JCI journal article supplement (doi:10.1172/jci150319), 2021-05-20
Supplement: sd1 [file 1]

## **SUPPLEMENTARY APPENDIX**

### **Efficient maternal to neonatal transfer of antibodies against SARS-CoV-2 and BNT162b2**

#### **mRNA COVID-19 vaccine**

Ofer Beharier, PhD, MD<sup>1,2\*</sup>, Romina Plitman Mayo, PhD<sup>2\*</sup>, Tal Raz, DVM, PhD, Dipl. ACT<sup>3</sup>, Kira Nahum Sacks MD<sup>4</sup>, Letizia Schreiber MD<sup>5</sup>, Yael Suissa-Cohen, MD<sup>1</sup>, Rony Chen, MD<sup>6</sup>, Rachel Gomez-Tolub, MD<sup>6</sup>, Eran Hadar MD<sup>6</sup>, Rinat Gabbay-Benziv, MD<sup>7</sup>, Yuval Jaffe Moshkovich, M.P.H., C.N.M.<sup>7</sup>, Tal Biron-Shental MD<sup>8</sup>, Gil Shechter-Maor MD<sup>8</sup>, Sivan Farladansky-Gershnel MD<sup>8</sup>, Hen Yitzhak Sela, MD<sup>9</sup>, Hedi Benyamini Raischer, MD<sup>10</sup>, Nitzan Dana Sela, MD<sup>10</sup>, Debra Goldman-Wohl, PhD<sup>1</sup>, Ziv Shulman PhD<sup>11</sup>, Ariel Many, MD<sup>12</sup>, Haim Barr, PhD<sup>13</sup>, Simcha Yagel, MD<sup>1\*\*</sup>, Michal Neeman, PhD<sup>2\*\*</sup> and Michal Kovo, PhD, MD<sup>4\*\*</sup>

## Supplementary Figures

### Supplementary Figure S1

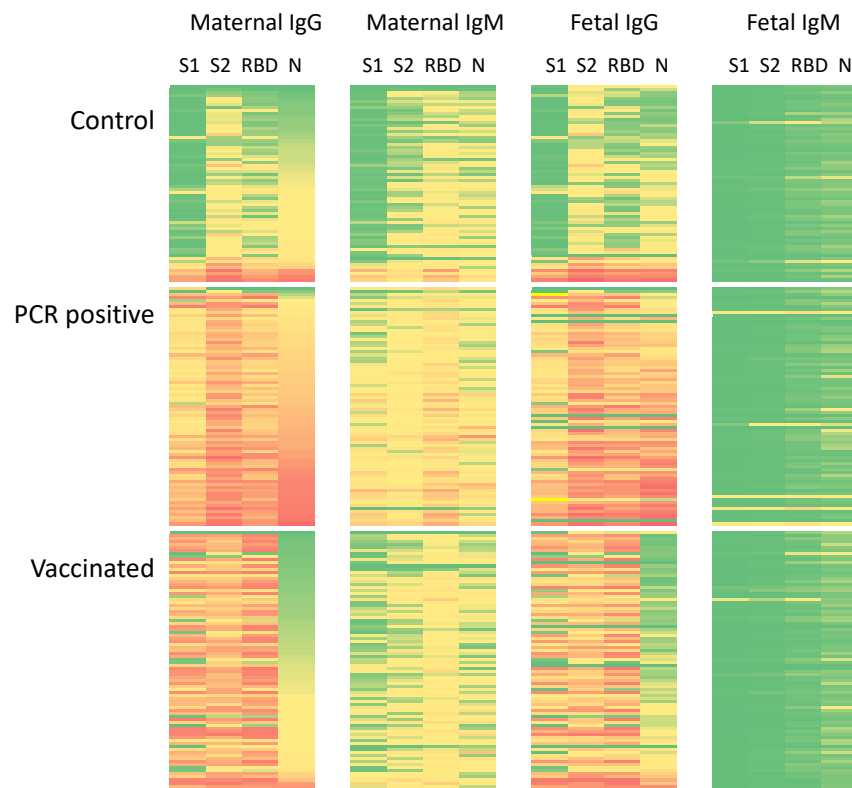

Figure S1 Serological heat map

The heat map was generated from the acquired IgG and IgM serological data segregated by the main recruitment groups (Control, PCR-positive, and Vaccinated patients). From left to right Maternal IgG (S1, S2, RBD, N), Maternal IgM (S1, S2, RBD, N), Fetal IgG (S1, S2, RBD, N) and Fetal IgM (S1, S2, RBD, N). Each row represents matched maternal-fetal data, ranked by the maternal IgG reactivity to N antigen within each group (Low, green; high, red). Note the small number of serologically N<sup>+</sup> mothers (high N in red) within the control and the vaccinated groups.

Supplementary Figure S2

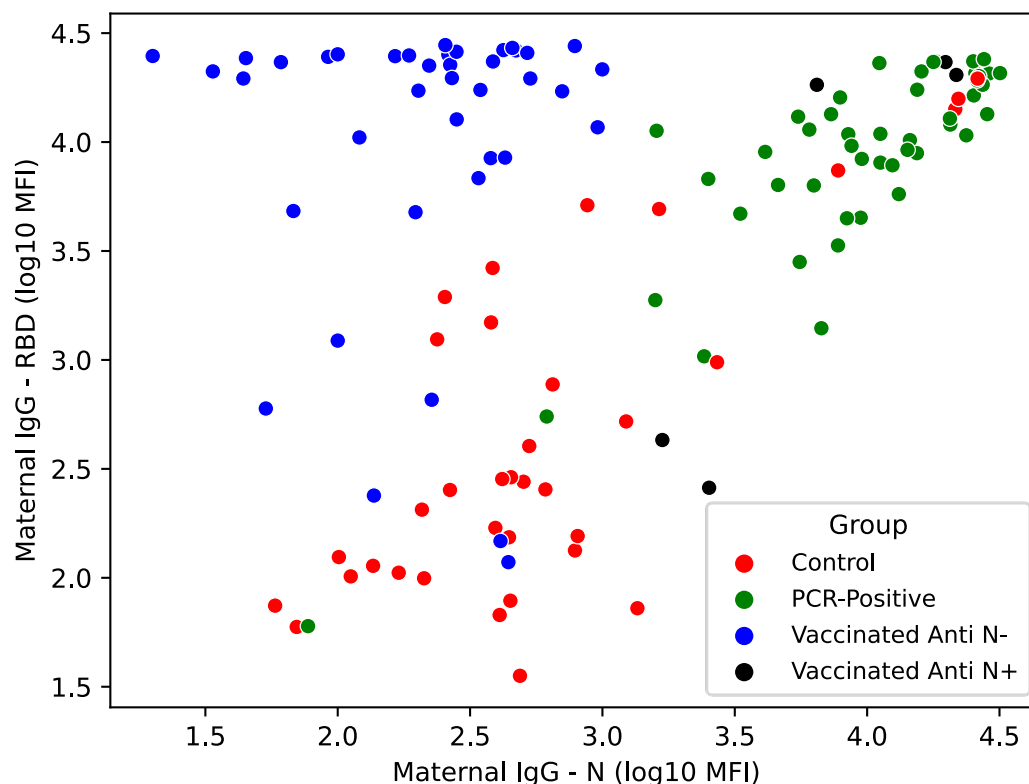

Figure S2 Cluster analysis of all study participants by maternal response to N and RBD. Since Nucleocapsid antigen (N) is present in the intact virus but is not included in the BNT162b2 mRNA COVID-19 vaccine, high IgG titer for N reveals patients exposed to the virus. On the other hand, RBD is present in the vaccine as well as the virus. Thus, high IgG for both RBD and N reveal a small number of patients exposed to the virus within the control group (red) as well as vaccinated (black), which cluster with the PCR-positive group (green; upper right cluster). Low IgG for N and high IgG for RBD was found for the majority of the vaccinated patients (blue; upper left corner). The unvaccinated control group which showed no humoral response indicative of prior infection cluster in the bottom lower corner (red).

Supplementary Figure S3

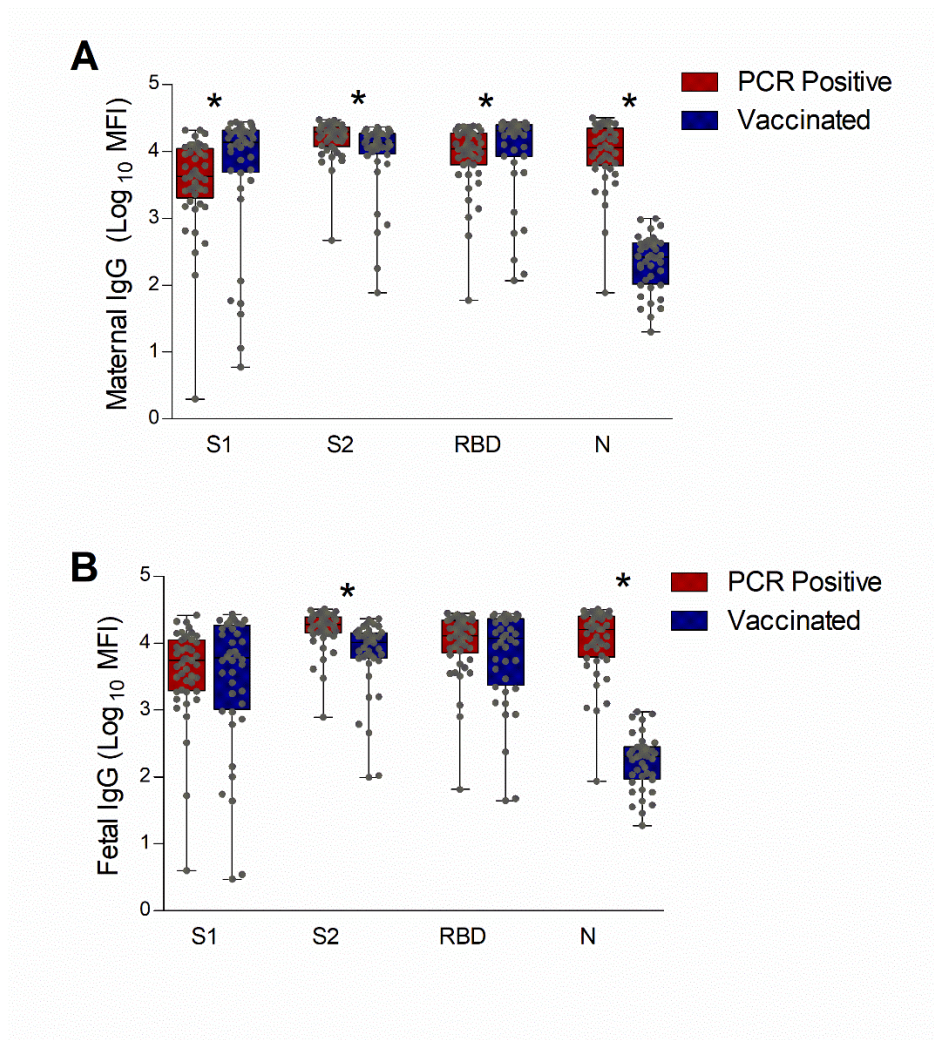

Figure S3. Maternal and fetal IgG for S1, S2 RBD and N following SARS-Co2 infection vs. vaccination. \*indicate a significant difference in antibody levels between PCR positive vs. vaccinated patients (Wilcoxon Rank Sum Test).

Supplementary Figure S4 Placental Samples Examination

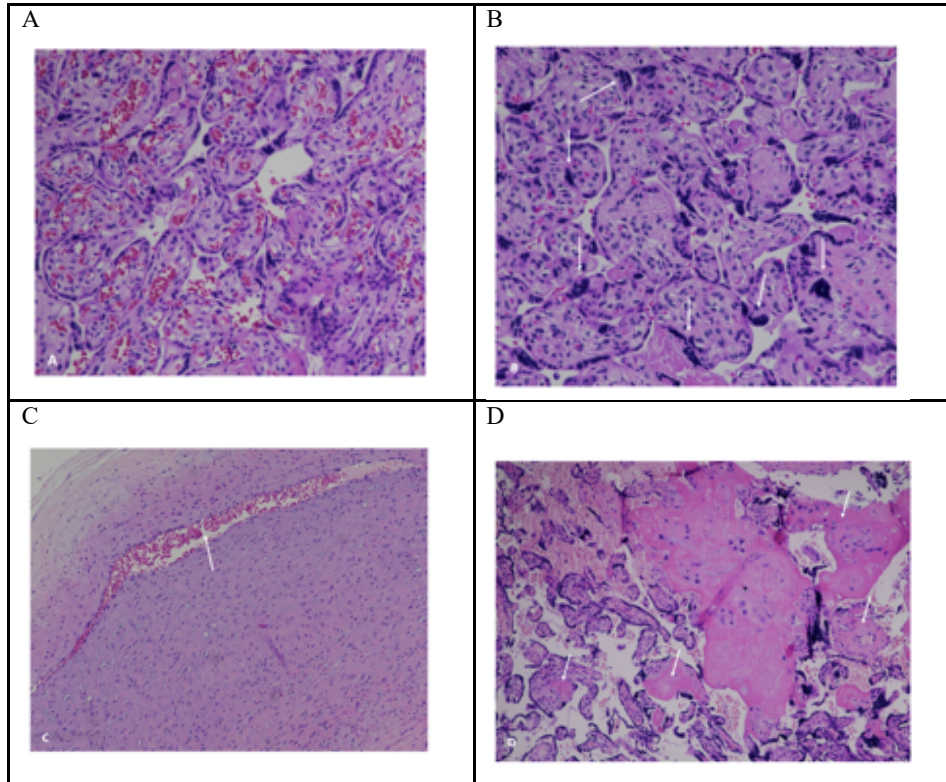

Supplementary Figure S4. Placental Samples Examination. hematoxylin-eosin, original magnification X10

- A- Normal histologic appearance of placental villi (from a vaccinated patient)
- B- Maternal vascular malperfusion lesion- increased syncytial knots (arrows) (from past covid 19 infected parturient)
- C- Fetal vascular malperfusion lesion- chorionic vessel with intramural fibrin deposition. Arrow towards vessel lumen (from a vaccinated patient)
- D- Maternal vascular malperfusion lesion- increased intervillous fibrin deposition (arrows) (from past covid 19 infected parturient)

## Supplementary Tables

**Supplementary Table S1.** Statistical analysis of maternal and fetal serological response to vaccination. Analysis of the data presented in Figure 3D

| Ab type       | Comparison                                                                 | Statistical test                                                                 | P value  |
|---------------|----------------------------------------------------------------------------|----------------------------------------------------------------------------------|----------|
| <b>IgG S1</b> | Maternal Ab concentrations among groups                                    | Kruskall–Wallis one-way ANOVA, followed by Dunn's All-Pairwise Comparisons Test. | < 0.0001 |
|               | Fetal Ab concentrations among groups                                       | Kruskall–Wallis one-way ANOVA, followed by Dunn's All-Pairwise Comparisons Test. | < 0.0001 |
|               | Maternal vs. fetal Ab concentrations within the Control group              | Paired t-test                                                                    | 0.0034   |
|               | Maternal vs. fetal Ab concentrations within the 1 <sup>st</sup> Dose group | Paired t-test                                                                    | 0.0050   |
|               | Maternal vs. fetal Ab concentrations within the 2nd Dose group             | Paired t-test                                                                    | 0.0071   |
|               | Maternal vs. fetal Ab concentrations within the Fully-vaccinated group     | Paired t-test                                                                    | 0.0085   |
|               |                                                                            |                                                                                  |          |
| <b>IgG S2</b> | Maternal Ab concentrations among groups                                    | Kruskall–Wallis one-way ANOVA, followed by Dunn's All-Pairwise Comparisons Test. | < 0.0001 |
|               | Fetal Ab concentrations among groups                                       | Kruskall–Wallis one-way ANOVA, followed by Dunn's All-Pairwise Comparisons Test. | < 0.0001 |
|               | Maternal vs. fetal Ab concentrations within the Control group              | Paired t-test                                                                    | 0.4190   |
|               | Maternal vs. fetal Ab concentrations within the 1 <sup>st</sup> Dose group | Paired t-test                                                                    | 0.0203   |

|                |                                                                            |                                                                                  |          |
|----------------|----------------------------------------------------------------------------|----------------------------------------------------------------------------------|----------|
|                | Maternal vs. fetal Ab concentrations within the 2nd Dose group             | Paired t-test                                                                    | 0.0930   |
|                | Maternal vs. fetal Ab concentrations within the Fully-vaccinated group     | Paired t-test                                                                    | 0.0197   |
|                |                                                                            |                                                                                  |          |
| <b>IgG RBD</b> | Maternal Ab concentrations among groups                                    | Kruskall–Wallis one-way ANOVA, followed by Dunn's All-Pairwise Comparisons Test. | < 0.0001 |
|                | Fetal Ab concentrations among groups                                       | Kruskall–Wallis one-way ANOVA, followed by Dunn's All-Pairwise Comparisons Test. | < 0.0001 |
|                | Maternal vs. fetal Ab concentrations within the Control group              | Paired t-test                                                                    | 0.0084   |
|                | Maternal vs. fetal Ab concentrations within the 1 <sup>st</sup> Dose group | Paired t-test                                                                    | 0.0052   |
|                | Maternal vs. fetal Ab concentrations within the 2nd Dose group             | Paired t-test                                                                    | 0.0069   |
|                | Maternal vs. fetal Ab concentrations within the Fully-vaccinated group     | Paired t-test                                                                    | 0.0339   |
|                |                                                                            |                                                                                  |          |
| <b>IgG N</b>   | Maternal Ab concentrations among groups                                    | Kruskall–Wallis one-way ANOVA, followed by Dunn's All-Pairwise Comparisons Test. | 0.3016   |
|                | Fetal Ab concentrations among groups                                       | Kruskall–Wallis one-way ANOVA, followed by Dunn's All-Pairwise Comparisons Test. | 0.3869   |
|                | Maternal vs. fetal Ab concentrations within the Control group              | Paired t-test                                                                    | 0.0142   |
|                | Maternal vs. fetal Ab concentrations within the 1 <sup>st</sup> Dose group | Paired t-test                                                                    | 0.0562   |
|                | Maternal vs. fetal Ab concentrations within the 2nd Dose group             | Paired t-test                                                                    | 0.2313   |
|                | Maternal vs. fetal Ab concentrations within the Fully-vaccinated group     | Paired t-test                                                                    | 0.08903  |
|                |                                                                            |                                                                                  |          |



| Ab type        | Comparison                                                                 | Statistical test                                                                 | P value  |
|----------------|----------------------------------------------------------------------------|----------------------------------------------------------------------------------|----------|
| <b>IgM S1</b>  | Maternal Ab concentrations among groups                                    | Kruskall–Wallis one-way ANOVA, followed by Dunn's All-Pairwise Comparisons Test. | < 0.0001 |
|                | Fetal Ab concentrations among groups                                       | Kruskall–Wallis one-way ANOVA, followed by Dunn's All-Pairwise Comparisons Test. | 0.1176   |
|                | Maternal vs. fetal Ab concentrations within the Control group              | Paired t-test                                                                    | < 0.0001 |
|                | Maternal vs. fetal Ab concentrations within the 1 <sup>st</sup> Dose group | Paired t-test                                                                    | < 0.0001 |
|                | Maternal vs. fetal Ab concentrations within the 2nd Dose group             | Paired t-test                                                                    | < 0.0001 |
|                | Maternal vs. fetal Ab concentrations within the Fully-vaccinated group     | Paired t-test                                                                    | < 0.0001 |
| <b>IgM S2</b>  | Maternal Ab concentrations among groups                                    | Kruskall–Wallis one-way ANOVA, followed by Dunn's All-Pairwise Comparisons Test. | 0.0417   |
|                | Fetal Ab concentrations among groups                                       | Kruskall–Wallis one-way ANOVA, followed by Dunn's All-Pairwise Comparisons Test. | 0.7675   |
|                | Maternal vs. fetal Ab concentrations within the Control group              | Paired t-test                                                                    | < 0.0001 |
|                | Maternal vs. fetal Ab concentrations within the 1 <sup>st</sup> Dose group | Paired t-test                                                                    | < 0.0001 |
|                | Maternal vs. fetal Ab concentrations within the 2nd Dose group             | Paired t-test                                                                    | < 0.0001 |
|                | Maternal vs. fetal Ab concentrations within the Fully-vaccinated group     | Paired t-test                                                                    | < 0.0001 |
| <b>IgM RBD</b> | Maternal Ab concentrations among groups                                    | Kruskall–Wallis one-way ANOVA, followed by Dunn's All-Pairwise Comparisons Test. | 0.0067   |
|                | Fetal Ab concentrations among groups                                       | Kruskall–Wallis one-way ANOVA, followed by Dunn's All-Pairwise Comparisons Test. | 0.0560   |



|              |                                                                            |                                                                                  |          |
|--------------|----------------------------------------------------------------------------|----------------------------------------------------------------------------------|----------|
|              | Maternal vs. fetal Ab concentrations within the Control group              | Paired t-test                                                                    | < 0.0001 |
|              | Maternal vs. fetal Ab concentrations within the 1 <sup>st</sup> Dose group | Paired t-test                                                                    | < 0.0001 |
|              | Maternal vs. fetal Ab concentrations within the 2nd Dose group             | Paired t-test                                                                    | < 0.0001 |
|              | Maternal vs. fetal Ab concentrations within the Fully-vaccinated group     | Paired t-test                                                                    | < 0.0001 |
|              |                                                                            |                                                                                  |          |
| <b>IgM N</b> | Maternal Ab concentrations among groups                                    | Kruskall–Wallis one-way ANOVA, followed by Dunn's All-Pairwise Comparisons Test. | 0.9558   |
|              | Fetal Ab concentrations among groups                                       | Kruskall–Wallis one-way ANOVA, followed by Dunn's All-Pairwise Comparisons Test. | 0.1804   |
|              | Maternal vs. fetal Ab concentrations within the Control group              | Paired t-test                                                                    | < 0.0001 |
|              | Maternal vs. fetal Ab concentrations within the 1 <sup>st</sup> Dose group | Paired t-test                                                                    | < 0.0001 |
|              | Maternal vs. fetal Ab concentrations within the 2nd Dose group             | Paired t-test                                                                    | < 0.0001 |
|              | Maternal vs. fetal Ab concentrations within the Fully-vaccinated group     | Paired t-test                                                                    | < 0.0001 |
|              |                                                                            |                                                                                  |          |

Supplementary Table S2

### Placental Samples Examination

Placental pathology examinations were performed on randomly taken placental tissue samples of 1X1 cm<sup>3</sup> thickness, that were fixed in formalin and embedded in paraffin blocks for microscopic assessment. All examinations were done by a single pathologist (author L.S.), who

was blinded to the study groups the samples were taken from. Placental lesions were divided into 3 main groups: 1. Maternal vascular malperfusion (MVM) lesions that included: decidual vasculopathy, increased syncytial knots, villous agglutination, increased intervillous fibrin deposition, and villous infarcts; 2. Fetal vascular malperfusion (FVM) lesions that included large vessel thrombosis or fetal thrombotic vasculopathy, hypovascular, fibrotic and avascular villi; 3. Chronic villitis that was defined as villitis of unknown etiology, plasma cell deciduitis, or chronic intervillitis;

Fourteen placental tissue samples were microscopically examined. The rate of malperfusion lesions was similar in the examined placental tissue

| Placental lesions | Control<br>n=5 | Past Covid -19<br>n=3 | Vaccinated<br>n=6 |
|-------------------|----------------|-----------------------|-------------------|
| MVM               | 1              | 2                     | 2                 |
| FVM               | 2              | 0                     | 2                 |
| Chronic villitis  | 0              | 0                     | 1                 |
